# Supplementary material for: Prediction of two-dimensional monolayer C2O2Fe with chiral magnetic and ferroelectric orders
Source: Royal Society of Chemistry journal article supplement (doi:10.1039/d2cp01492k), 2022-01-01
Supplement: d2cp01492k4.pdf [file d2cp01492k4.pdf]

## Supplemental Material

### Prediction of two-dimensional monolayer $C_2O_2Fe$ with chiral magnetic and ferroelectric orders

Chenduo Geng<sup>1#</sup>, Xin Wang<sup>1,2,3#</sup>, Shijun Zhang<sup>1</sup>,

Zhengchao Dong<sup>1</sup>, Bin Xu<sup>2,3\*</sup>, Chonggui Zhong<sup>1,2\*</sup>

<sup>1</sup> School of Sciences, Nantong University, Nantong 226019, China

<sup>2</sup> School of Physical Science and Technology, Soochow University, Suzhou, 215006, China

<sup>3</sup> Institute of Theoretical and Applied Physics, Soochow University, Suzhou, 215006, China

E-mail: [chgzhong@ntu.edu.cn](mailto:chgzhong@ntu.edu.cn) or [binxu19@suda.edu.cn](mailto:binxu19@suda.edu.cn)

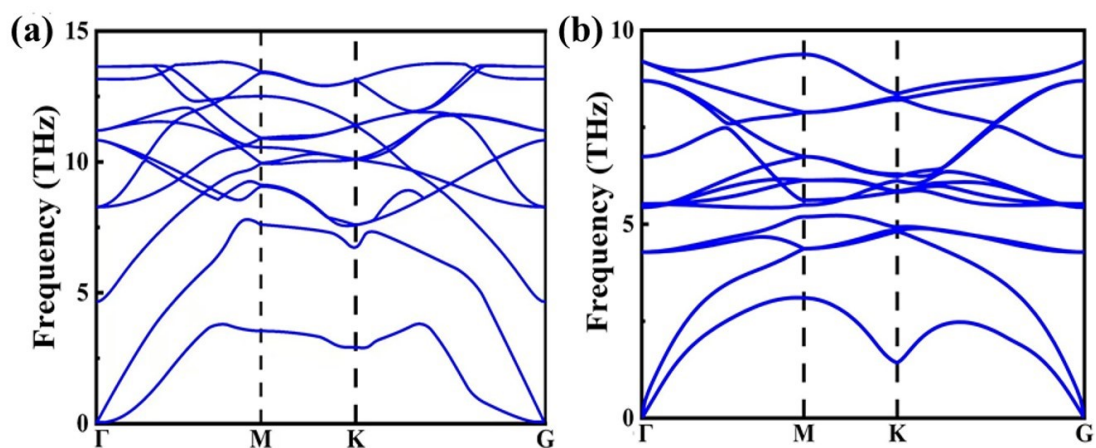

Fig.S1 Phonon dispersion of  $C_2O_2Fe$  monolayer at (a) 0% strain and (b) 30% strain, where all acoustic branch frequencies are positive, indicating its dynamic stability. Meanwhile, the highest optical frequency at no strain is higher than that at 30% one, suggesting the stronger bonding nature at no strain.

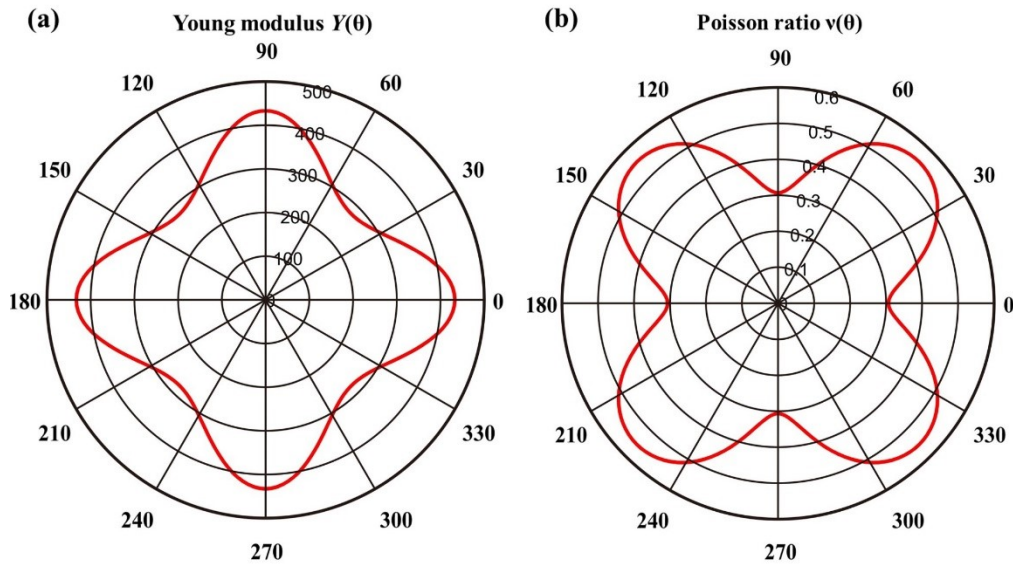

Fig.S2 In-plane (a) Young's modulus, (b) Poisson's ratio for  $C_2O_2Fe$  monolayer with 30% strain, where we find that Young's modulus and Poisson's ratios of  $C_2O_2Fe$  monolayer change from 289.32 N/m<sup>2</sup> and 0.56 at  $\theta = 45^\circ$  to 432.68 N/m<sup>2</sup> and 0.31 at  $\theta = 90^\circ$ . The maximum value of Young's modulus is less than these of many other 2D materials.<sup>1</sup> For Poisson's ratio, it is consistent to most of the 2D materials (0–0.5).<sup>2</sup>

## References

- 1 Z. Gao, X. Dong, N. Li, J. Ren, *Nano Lett.*, 2017, **17**, 772-777.
- 2 D. W. Boukhvalov, M. I. Katsnelson, *J. Am. Chem. Soc.*, 2008, **130**, 10697-10701.
