# Supplementary figures and images for: Prediction of two-dimensional monolayer C2O2Fe with chiral magnetic and ferroelectric orders
Source: Royal Society of Chemistry journal article supplement (doi:10.1039/d2cp01492k), 2022-01-01

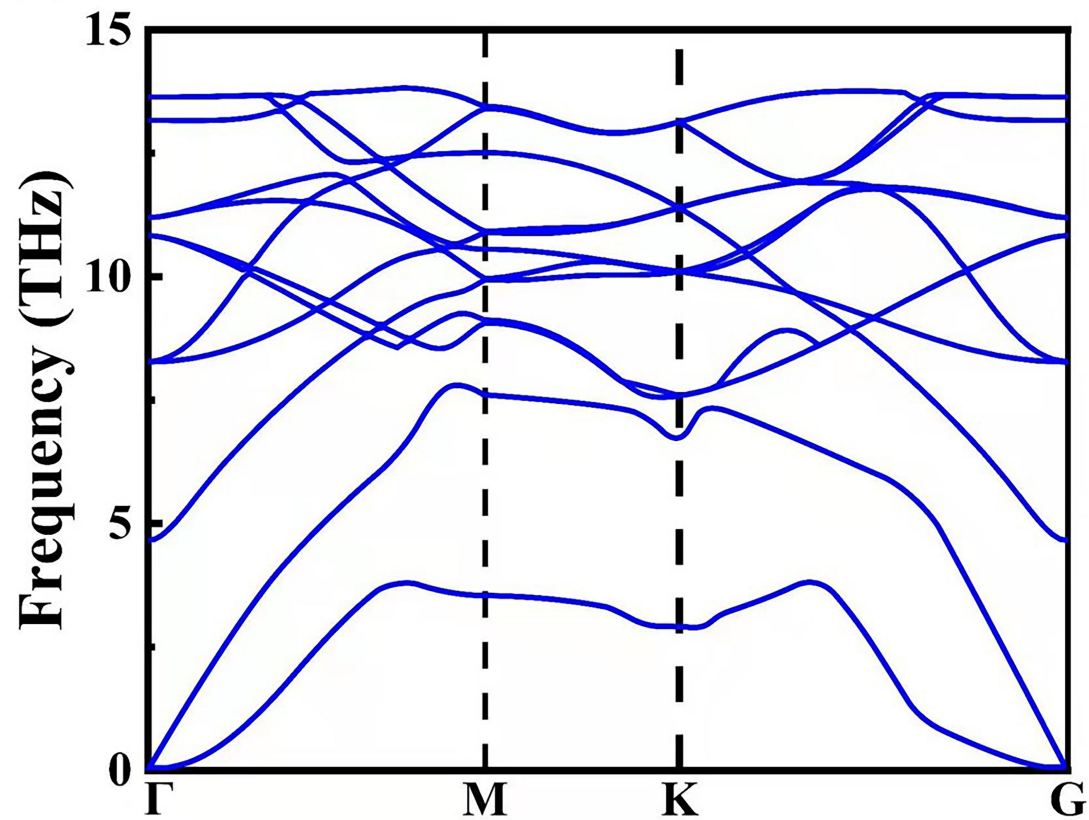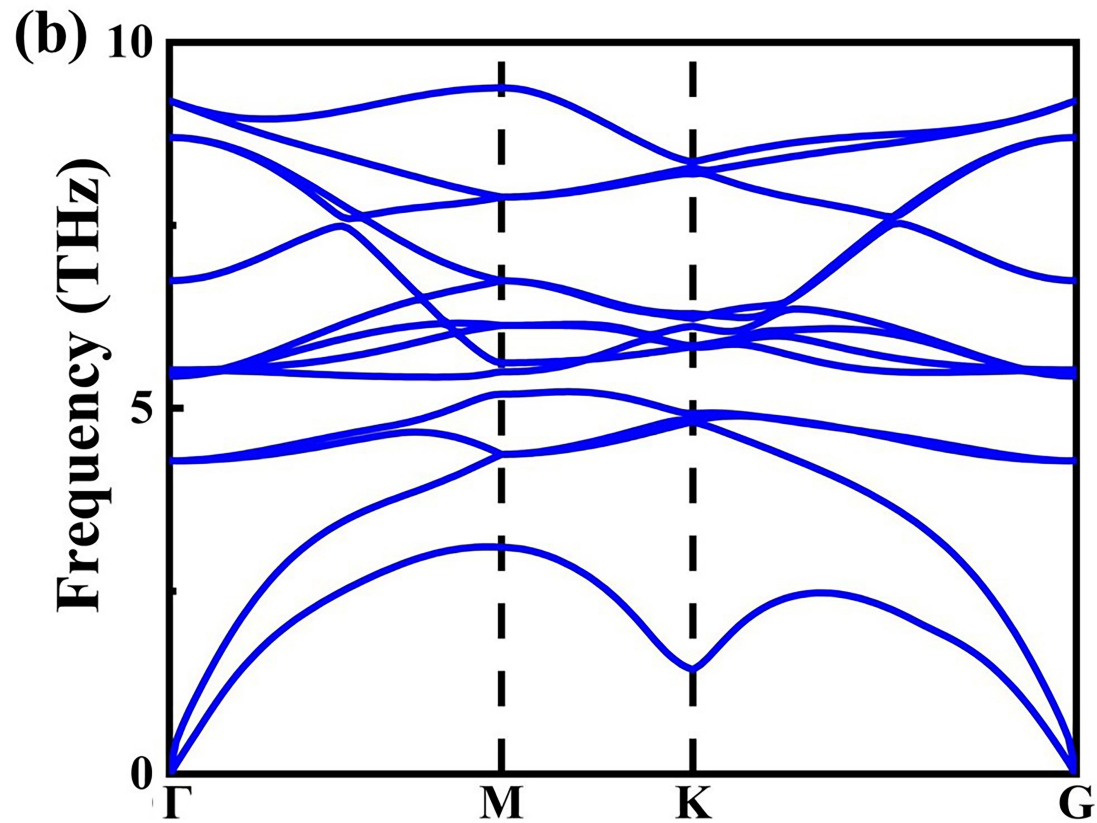

Supplement: d2cp01492k2.pdf [file d2cp01492k2.pdf]

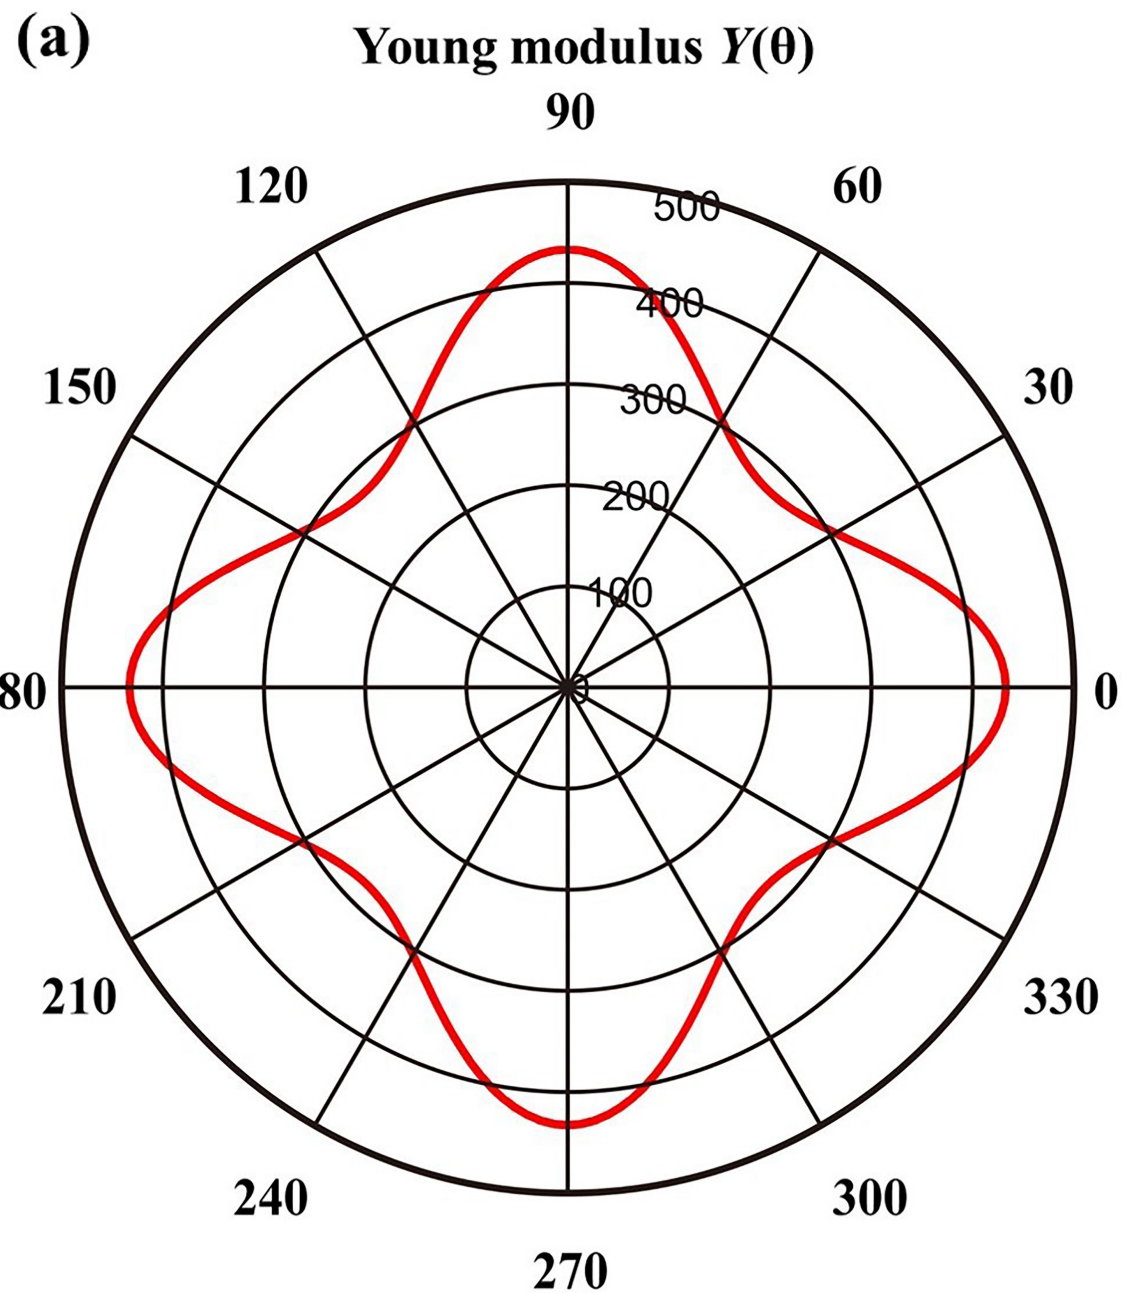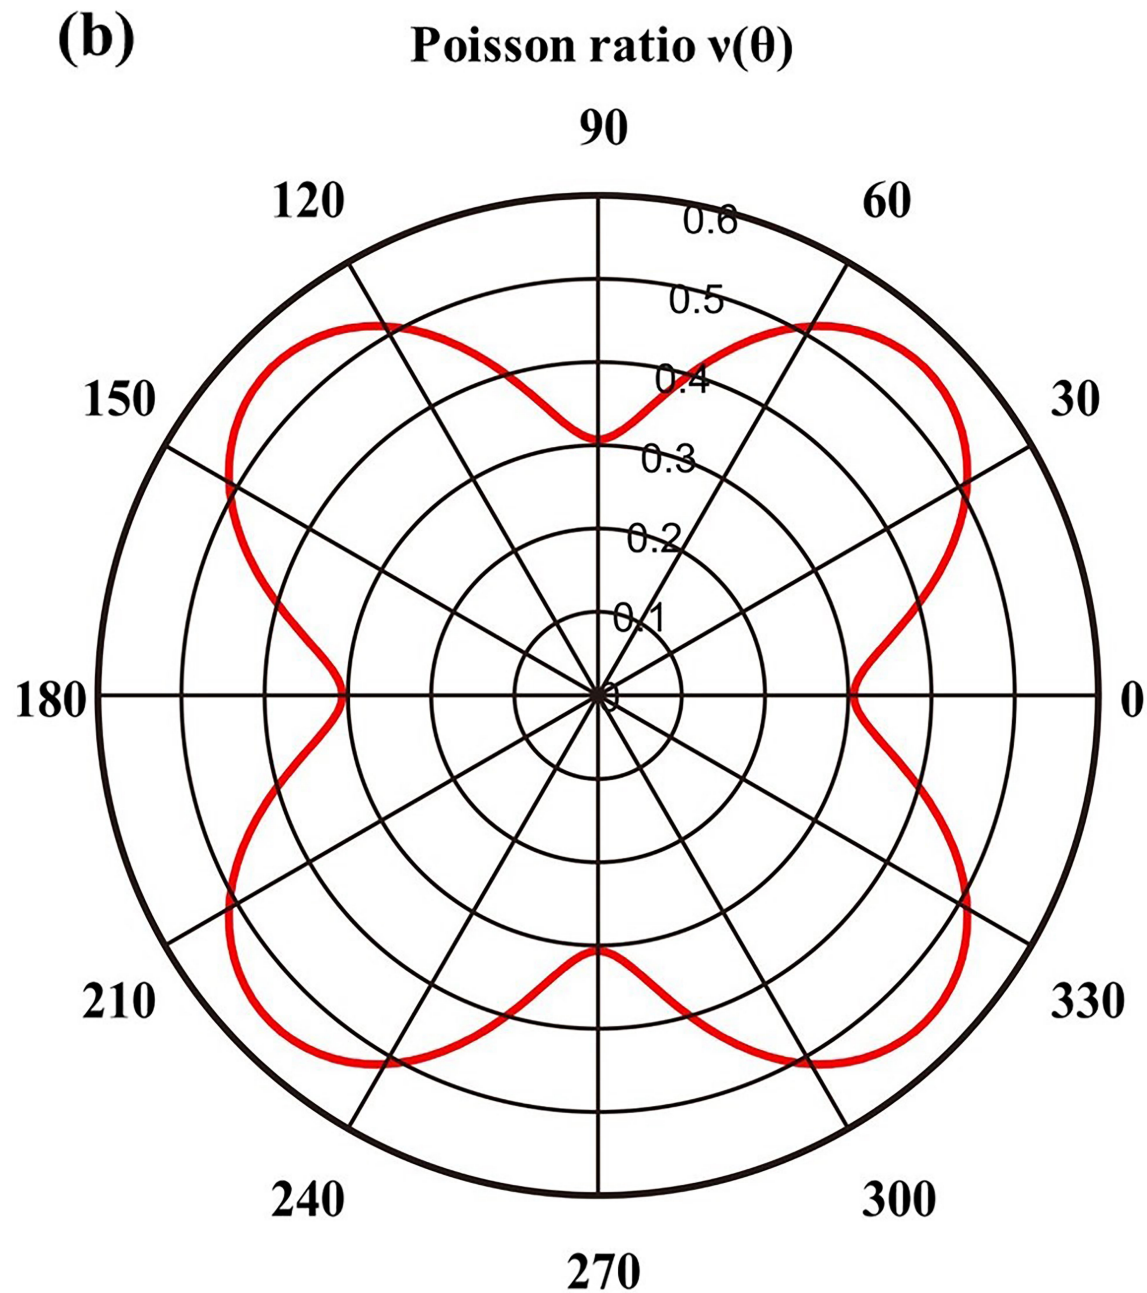

Supplement: d2cp01492k3.pdf [file d2cp01492k3.pdf]
